# Supplementary material
Source: HighWire-hosted journal article supplement (https://bmjopen.bmj.com/content/14/7/e073916)
Supplement: inline-supplementary-material-2 [file inline-supplementary-material-2.pdf]

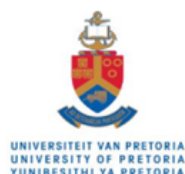

Faculty of Health Sciences

**Institution:** The Research Ethics Committee, Faculty Health Sciences, University of Pretoria complies with ICH-GCP guidelines and has US Federal wide Assurance.

- FWA 00002567, Approved dd 18 March 2022 and Expires 18 March 2027.
- IORG #: IORG0001762 OMB No. 0990-0279 Approved for use through June 30, 2025 and Expires 07/28/2026.

Faculty of Health Sciences **Research Ethics Committee**

9 November 2023

**Approval Certificate  
Annual Renewal**

Dear Mr SG Motha,

**Ethics Reference No.: 514/2021 – Line 3****Title: Development of a self-management programme for patients with chronic non-specific low back pain in Limpopo Province, South Africa**

The **Annual Renewal** as supported by documents received between 2023-10-24 and 2023-11-08 for your research, was approved by the Faculty of Health Sciences Research Ethics Committee on 2023-11-08 as resolved by its quorate meeting.

Please note the following about your ethics approval:

- Renewal of ethics approval is valid for 1 year, subsequent annual renewal will become due on 2024-11-09.
- The Research Ethics Committee (REC) must monitor your research continuously. To this end, you must submit as may be applicable for your kind of research:
  - a) annual reports;
  - b) reports requested *ad hoc* by the REC;
  - c) all visitation and audit reports by a regulatory body (e.g. the HPCSA, FDA, SAHPRA) within 10 days of receiving one;
  - d) all routine monitoring reports compiled by the Clinical Research Associate or Site Manager within 10 days of receiving one.
- The REC may select your research study for an audit or a site visitation by the REC.
- The REC may require that you make amendments and take corrective actions.
- The REC may suspend or withdraw approval.
- Please remember to use your protocol number (514/2021) on any documents or correspondence with the Research Ethics Committee regarding your research.

**Ethics approval is subject to the following:**

- The ethics approval is conditional on the research being conducted as stipulated by the details of all documents submitted to the Committee. In the event that a further need arises to change who the investigators are, the methods or any other aspect, such changes must be submitted as an Amendment for approval by the Committee.

We wish you the best with your research.

**Yours sincerely****On behalf of the FHS REC, Dr R Sommers**

MBChB, MMed (Int), MPharmMed, PhD

**Deputy Chairperson of the Faculty of Health Sciences Research Ethics Committee, University of Pretoria**

*The Faculty of Health Sciences Research Ethics Committee complies with the SA National Act 61 of 2003 as it pertains to health research and the United States Code of Federal Regulations Title 45 and 46. This committee abides by the ethical norms and principles for research, established by the Declaration of Helsinki, the South African Medical Research Council Guidelines as well as the Guidelines for Ethical Research: Principles Structures and Processes, Second Edition 2015 (Department of Health).*

Research Ethics Committee  
Room 4-60, Level 4, Tswelopele Building  
University of Pretoria, Private Bag X323  
Gezina 0031, South Africa  
Tel +27 (0)12 356 3084  
Email: deepeka.behari@up.ac.za  
www.up.ac.za

Fakulteit Gesondheidswetenskappe  
Lefapha la Disaense tsa Maphelo
